# Supplementary material for: Chemoradiotherapy for Synchronous Multiple Primary Cancers with Esophageal Squamous Cell Carcinoma: a Case-control Study
Source: PubMed Central journal article supplement — J Cancer. 2017 Feb 11;8(4):563–9. doi: 10.7150/jca.17408 (PMC5370500; doi:10.7150/jca.17408), 2017-02-11
Supplement: jcav08p0563s1.pdf [file jcav08p0563s1.pdf]

**Supplementary Table 1 Univariate analysis of prognostic factors**

| Variable                                    | No. | 2-year OS (%) | <i>p</i> | 2-year PFS (%) | <i>p</i> | 2-year LRPFS (%) | <i>p</i> | 2-year DPFS (%) | <i>p</i> |
|---------------------------------------------|-----|---------------|----------|----------------|----------|------------------|----------|-----------------|----------|
| All patients                                | 106 | 58.2          |          | 41.6           |          | 76.8             |          | 67.1            |          |
| Age                                         |     |               |          |                |          |                  |          |                 |          |
| ≥60                                         | 51  | 49.2          | 0.10     | 40.2           | 0.46     | 77.6             | 0.49     | 59.4            | 0.13     |
| <60                                         | 55  | 66.5          |          | 42.3           |          | 76.3             |          | 73.8            |          |
| Sex                                         |     |               |          |                |          |                  |          |                 |          |
| Male                                        | 90  | 55.4          | 0.079    | 36.4           | 0.026    | 74.0             | 0.18     | 63.3            | 0.074    |
| Female                                      | 16  | 74.0          |          | 68.8           |          | 87.5             |          | 86.5            |          |
| Location of primary esophageal cancer       |     |               |          |                |          |                  |          |                 |          |
| Cervix                                      | 23  | 68.2          | 0.32     | 60.9           | 0.29     | 89.8             | 0.47     | 69.6            | 0.39     |
| Upper 1/3 esophagus                         | 31  | 59.9          |          | 42.6           |          | 70.4             |          | 72.1            |          |
| Middle 1/3 esophagus                        | 46  | 54.7          |          | 34.3           |          | 76.7             |          | 66.5            |          |
| Lower 1/3 esophagus                         | 6   | 31.3          |          | 22.2           |          | 50.0             |          | 33.3            |          |
| Clinical stage of primary esophageal cancer |     |               |          |                |          |                  |          |                 |          |
| I-II                                        | 14  | 76.9          | 0.33     | 51.1           | 0.14     | 70.3             | 0.84     | 85.1            | 0.11     |
| III-IV                                      | 92  | 55.3          |          | 40.2           |          | 78.3             |          | 64.4            |          |
| KPS                                         |     |               |          |                |          |                  |          |                 |          |
| ≥90                                         | 87  | 57.3          | 0.95     | 37.9           | 0.83     | 73.7             | 0.56     | 66.3            | 0.69     |
| <90                                         | 19  | 62.3          |          | 57.0           |          | 88.5             |          | 71.5            |          |

|                         |    |      |      |      |       |      |      |      |       |
|-------------------------|----|------|------|------|-------|------|------|------|-------|
| Smoking                 |    |      |      |      |       |      |      |      |       |
| Yes                     | 72 | 55.3 | 0.22 | 36.1 | 0.20  | 74.0 | 0.63 | 62.6 | 0.28  |
| No                      | 34 | 64.5 |      | 52.6 |       | 82.2 |      | 75.9 |       |
| Drinking                |    |      |      |      |       |      |      |      |       |
| Yes                     | 49 | 44.7 | 0.12 | 29.0 | 0.078 | 82.0 | 0.31 | 54.9 | 0.067 |
| No                      | 57 | 69.0 |      | 52.4 |       | 71.0 |      | 77.0 |       |
| Family history          |    |      |      |      |       |      |      |      |       |
| Yes                     | 23 | 62.4 | 0.61 | 37.0 | 0.70  | 63.8 | 0.19 | 70.7 | 0.24  |
| No                      | 83 | 58.7 |      | 42.6 |       | 80.4 |      | 65.5 |       |
| BMI                     |    |      |      |      |       |      |      |      |       |
| <18.5                   | 18 | 48.0 | 0.20 | 34.9 | 0.49  | 74.6 | 0.39 | 51.6 | 0.21  |
| ≥18.5                   | 88 | 60.0 |      | 42.4 |       | 77.2 |      | 69.8 |       |
| Concurrent chemotherapy |    |      |      |      |       |      |      |      |       |
| TP/PF                   | 96 | 59.6 | 0.64 | 41.4 | 0.55  | 75.1 | 0.13 | 67.7 | 0.82  |
| 5-FU/platinum           | 10 | 42.2 |      | 42.9 |       | 100  |      | 60.0 |       |
| Induction chemotherapy  |    |      |      |      |       |      |      |      |       |
| Yes                     | 32 | 51.8 | 0.59 | 42.1 | 0.58  | 77.1 | 0.65 | 59.7 | 0.94  |
| No                      | 74 | 60.2 |      | 40.9 |       | 77.0 |      | 69.4 |       |
| RT technique            |    |      |      |      |       |      |      |      |       |
| 3D-CRT                  | 29 | 53.8 | 0.59 | 39.7 | 0.76  | 70.6 | 0.62 | 60.2 | 0.39  |
| IMRT/VMAT               | 77 | 60.1 |      | 41.8 |       | 79.7 |      | 69.7 |       |
| RT dose for primary     |    |      |      |      |       |      |      |      |       |

|                            |    |      |      |      |      |      |      |      |       |
|----------------------------|----|------|------|------|------|------|------|------|-------|
| esophageal cancer          |    |      |      |      |      |      |      |      |       |
| ≥60 Gy                     | 75 | 62.2 | 0.21 | 41.9 | 0.60 | 77.5 | 0.56 | 71.5 | 0.068 |
| <60 Gy                     | 31 | 49.2 |      | 46.1 |      | 77.1 |      | 58.5 |       |
| Location of second primary |    |      |      |      |      |      |      |      |       |
| cancer                     |    |      |      |      |      |      |      |      |       |
| Esophagus                  | 43 | 48.8 | 0.85 | 27.8 | 0.91 | 61.2 | 0.46 | 66.7 | 0.43  |
| Hypopharynx                | 8  | 58.3 |      | 33.3 |      | 62.5 |      | 50.0 |       |
| Stomach                    | 2  | 100  |      | 0    |      | 0    |      | 100  |       |
| Clinical stage of second   |    |      |      |      |      |      |      |      |       |
| primary cancer             |    |      |      |      |      |      |      |      |       |
| I-II                       | 34 | 51.0 | 0.94 | 26.6 | 0.34 | 56.6 | 0.36 | 64.1 | 0.95  |
| III-IV                     | 19 | 47.8 |      | 28.1 |      | 64.4 |      | 63.6 |       |
| RT dose for second         |    |      |      |      |      |      |      |      |       |
| primary cancer             |    |      |      |      |      |      |      |      |       |
| ≥60 Gy                     | 33 | 52.6 | 0.66 | 21.9 | 0.42 | 59.3 | 0.50 | 63.8 | 0.94  |
| <60 Gy                     | 23 | 53.7 |      | 50.1 |      | 63.6 |      | 67.7 |       |

---

OS: overall survival; PFS: progression-free survival; LRPFS: locoregional progression-free survival; DPFS: distant progression-free survival; KPS:

Karnofsky performance scale; BMI: body mass index; TP: taxane+ platinum; 5-FU: 5-fluorouracil; RT: radiotherapy; 3D-CRT: three-dimensional

conformal radiotherapy; IMRT: intensity modulated radiotherapy; VMAT: volumetric modulated arc therapy; CRT: chemoradiotherapy.
